## COMMENTARY

## Sulfide metabolism and the mechanism of torpor

Birgitte S. Jensen and Angela Fago\*

## ABSTRACT

Hibernation is a powerful response of a number of mammalian species to reduce energy during the cold winter season, when food is scarce. Mammalian hibernators survive winter by spending most of the time in a state of torpor, where basal metabolic rate is strongly suppressed and body temperature comes closer to ambient temperature. These torpor bouts are regularly interrupted by short arousals, where metabolic rate and body temperature spontaneously return to normal levels. The mechanisms underlying these changes, and in particular the strong metabolic suppression of torpor, have long remained elusive. As summarized in this Commentary, increasing evidence points to a potential key role for hydrogen sulfide (H<sub>2</sub>S) in the suppression of mitochondrial respiration during torpor. The idea that H<sub>2</sub>S could be involved in hibernation originated in some early studies, where exogenous H<sub>2</sub>S gas was found to induce a torpor-like state in mice, and despite some controversy, the idea persisted. H<sub>2</sub>S is a widespread signaling molecule capable of inhibiting mitochondrial respiration *in vitro* and studies found significant *in vivo* changes in endogenous H<sub>2</sub>S metabolites associated with hibernation or torpor. Along with increased expression of H<sub>2</sub>S-synthesizing enzymes during torpor, H<sub>2</sub>S degradation catalyzed by the mitochondrial sulfide:quinone oxidoreductase (SQR) appears to have a key role in controlling H<sub>2</sub>S availability for inhibiting respiration. Specifically, in thirteen-lined squirrels, SQR is highly expressed and inhibited in torpor, possibly by acetylation, thereby limiting H<sub>2</sub>S oxidation and causing inhibition of respiration. H<sub>2</sub>S may also control other aspects associated with hibernation, such as synthesis of antioxidant enzymes and of SQR itself.

**KEY WORDS:** H<sub>2</sub>S, Hypometabolism, Mitochondria, Sulfide:quinone oxidoreductase, Hibernation

## Introduction

Hibernation is a seasonal physiological state of a number of mammalian species, where metabolic rate and body temperature are depressed for several days, which enables energy saving during winter (Heldmaier et al., 2004; Staples, 2014). During winter, small hibernators, such as the thirteen-lined ground squirrel (*Ictidomys tridecemlineatus*), reduce their energy requirement by fasting and spend most of their time in a state of deep metabolic depression named torpor, where metabolic rate decreases by ~95% and body temperature drops down to ~5°C (Heldmaier et al., 2004; Muleme et al., 2006; Staples, 2016). These torpor bouts are periodically interrupted by short arousals of few hours (~12–24 h), named interbout euthermia (IBE), where metabolic rate and body temperature are restored (Fig. 1A). Compared with smaller hibernators, bears have already low mass-specific basal metabolic

rates and exhibit a less marked suppression of basal metabolism during torpor (Heldmaier et al., 2004). Large hibernators such as bears maintain a fairly high body temperature (~30°C) during torpor and do not cycle between states of torpor and IBE as regularly as squirrels, but still experience considerable decreases in metabolic rate of ~75% (Tøien et al., 2011) (Fig. 1B). Thus, the metabolic depression of torpor is actively regulated, i.e. it does not follow body temperature passively (Heldmaier et al., 2004; Staples, 2014). For all hibernators, the changes in metabolic rate are paralleled by changes in ventilation rate and heart rate (MacCannell et al., 2018; Milsom and Jackson, 2011) to match oxygen supply with consumption, reaching a minimum level during torpor (Heldmaier et al., 2004). Thus, metabolism is essentially aerobic during hibernation and sustained by lipid catabolism of fat tissue (Hindle et al., 2014) without lactate buildup (Ma et al., 2005; Revsbech et al., 2013; Serkova et al., 2007). However, the molecular mechanisms underlying the metabolic rate suppression of torpor appear complex and are not yet fully understood (Giroud et al., 2021). In this Commentary, we highlight some recent advances indicating that hydrogen sulfide (H<sub>2</sub>S), a widespread signaling molecule, plays a potentially key role in the suppression of metabolic rate during torpor.

The gasotransmitter H<sub>2</sub>S is a signaling molecule continuously synthesized and degraded *in vivo* that can modify the function of target proteins and enzymes. It is also stored in tissues as protein-bound persulfide and polysulfide (Kolluru et al., 2013) and transported in blood (Bianco et al., 2018; Jensen and Fago, 2020). Bound and unbound H<sub>2</sub>S are in equilibrium *in vivo*, with measured biological levels of free H<sub>2</sub>S in the nanomolar to micromolar range, depending on the method used (Shen et al., 2015; Ditrói et al., 2019). *In vivo* levels of H<sub>2</sub>S are also tightly controlled by several factors, including redox buffer capacity of protein cysteines reacting with H<sub>2</sub>S (generating a pool of protein-bound sulfide, from which H<sub>2</sub>S can be regenerated), local pH determining the ratio of H<sub>2</sub>S/HS<sup>-</sup> and the availability of oxygen for its oxidation and removal (Kolluru et al., 2013). At concentrations exceeding the low micromolar physiological levels, H<sub>2</sub>S is a highly toxic molecule, and inhalation of >250–500 ppm ambient H<sub>2</sub>S can be lethal for humans (Olson, 2011). This is due to the inhibitory effect of H<sub>2</sub>S on cytochrome *c* oxidase, the O<sub>2</sub>-consuming complex IV of the mitochondrial electron transport system (ETS) (Collman et al., 2009; Cooper and Brown, 2008; Nicholls et al., 2013). However, two studies found that inhalation of low levels of exogenous H<sub>2</sub>S (80 ppm) induced a reversible torpor-like state in mice during hypoxia (Blackstone et al., 2005; Volpato et al., 2008), suggesting that H<sub>2</sub>S suppressed metabolic rate and body temperature. These results had a strong impact but also raised some controversy, as inhaled H<sub>2</sub>S had no effect on large mammals such as sheep and piglets (Haouzi et al., 2008; Li et al., 2008) and it was also argued that hypoxia itself could cause torpor and facilitate H<sub>2</sub>S effects (Hemelrijk et al., 2018). In reality, many of these studies were performed under varying experimental conditions (summarized in Table 1), including different exposure protocols, ambient temperature, fasting and use

Department of Biology, Aarhus University, Aarhus C 8000, Denmark.

\*Author for correspondence (angela.fago@bio.au.dk)

 B.S.J., 0000-0002-6667-7183; A.F., 0000-0001-7315-2628

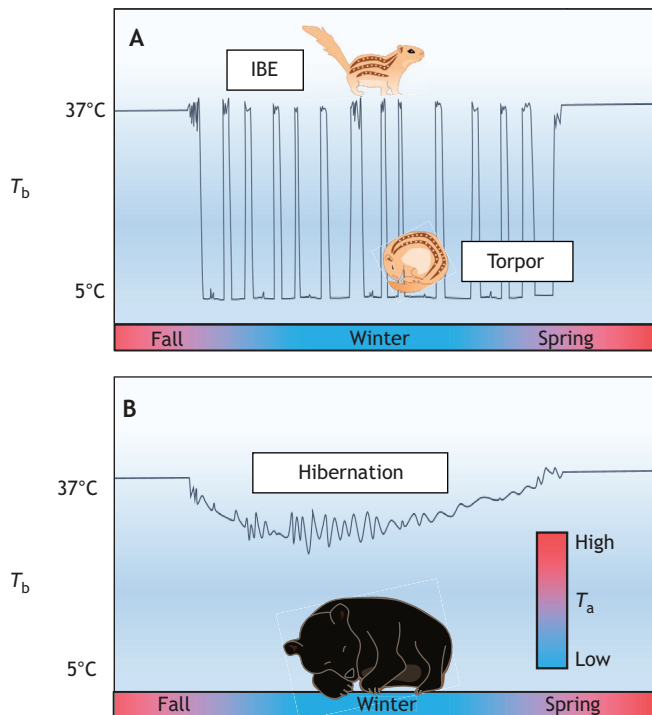

**Fig. 1. Hibernation patterns in thirteen-lined ground squirrels and bears.** Schematic diagrams showing (A) regular patterns of body temperature ( $T_b$ ) changes between torpor bouts and arousals to interbout euthermia (IBE) during winter hibernation for a thirteen-lined ground squirrel and (B) multiday cycles of  $T_b$  oscillations in a hibernating black bear.  $T_a$  is the ambient temperature. Traces are free-hand drawings inspired by data from Staples and Brown (2008) and Tøien et al. (2011).

of anesthesia, making it difficult to assess under which conditions externally supplied  $H_2S$  gas may work. A recent study (Marutani et al., 2021) demonstrates that prior exposures to 80 ppm  $H_2S$  gas (‘sulfide preconditioning’) eliminate the inhibitory effects on metabolic rate in mice, which might have been the case in some earlier data.

To understand the possible role of  $H_2S$  in torpor, other studies have focused on endogenous rather than exogenous  $H_2S$ . Supporting a role for  $H_2S$  in hibernation, significant *in vivo* changes in the levels and composition of  $H_2S$  metabolites have been detected in the plasma and liver of thirteen-lined ground squirrels

(D’Alessandro et al., 2017; Jensen et al., 2021), in the plasma of brown bears (Revsbech et al., 2014) and in the lung of Syrian hamsters (Talaie et al., 2012) during winter hibernation (bears) or torpor (squirrels and hamsters). In addition, emerging evidence of increased enzymatic synthesis of  $H_2S$  (Talaie et al., 2012; D’Alessandro et al., 2017) and decreased degradation (Jensen et al., 2021) during torpor point towards a potential role of  $H_2S$  as a key physiological signaling molecule in controlling torpor *in vivo*. Here, we provide an overview of recent studies on how *in vivo*  $H_2S$  production and degradation may change during hibernation and suppress metabolic rate during torpor.

**$H_2S$  production during torpor**

$H_2S$  is ubiquitously produced from sulfur-containing substrates including cysteine, homocysteine and cystathionine by the cytosolic enzymes cystathionine  $\beta$ -synthase (CBS) and cystathionine  $\gamma$ -lyase (CSE) (Fig. 2). Moreover, the enzyme 3-mercaptopyruvate sulfurtransferase (MST), found in both the mitochondria and cytosol, can synthesize  $H_2S$  from 3-mercaptopyruvate in the presence of reducing co-substrates. Enzymatic  $H_2S$  production depends on several factors, such as enzyme expression and localization, substrate availability and the presence of various modulators (Giuffrè and Vicente, 2018; Kabil et al., 2011; Talaie et al., 2011). A metabolomics study on thirteen-lined ground squirrels found that substrates cysteine and cystathionine peak in the plasma during late torpor, suggesting increased  $H_2S$  production and complex IV inhibition (D’Alessandro et al., 2017). That study also proposed a model whereby CBS is activated by a nitric-oxide-dependent mechanism, suggesting the existence of a series of events in triggering and sustaining  $H_2S$ -based torpor. However, in studies by our group, we detected higher levels of plasma  $H_2S$  in summer compared with late torpor and IBE in thirteen-lined ground squirrels (Jensen et al., 2021) and in summer-active brown bears compared with winter-hibernating ones (Revsbech et al., 2014). These findings indicate that increased availability of plasma substrate for enzymatic  $H_2S$  synthesis may not necessarily reflect increased plasma  $H_2S$  levels. Plasma  $H_2S$  may derive from several sources, including extracellular enzymatic production by CSE and CBS secreted by endothelial cells and the liver (Bearden et al., 2010) and  $H_2S$  produced in the red blood cells (Revsbech et al., 2014; Vitvitsky et al., 2015) or carried by hemoglobin (Bianco et al., 2018; Jensen and Fago, 2018, 2020). Thus, an increased enzymatic production of  $H_2S$  in tissues during torpor may be difficult to detect in plasma. Also, circulating plasma cysteine in winter-hibernating

**Table 1. Overview of published values of body temperature ( $T_b$ ) and metabolic rate decrease after exposure to  $H_2S$  gas under varying experimental protocols**

| Inhaled $H_2S$ (ppm) | Inhaled $O_2$ (%) | Duration          | Species      | Anesthesia | Fasted | $T_a$ (°C) | $T_b$ (°C)      | % Metabolic rate at end of exposure     | Reference                |
|----------------------|-------------------|-------------------|--------------|------------|--------|------------|-----------------|-----------------------------------------|--------------------------|
| 80                   | 17.5              | 6 h               | Mouse        | No         | n.r.   | 25–13      | 13              | 10%                                     | Blackstone et al. (2005) |
| 80                   | 17.5              | 6 h               | Mouse        | No         | No     | 27         | 29.3            | 70% at 10–30 min                        | Volpato et al. (2008)    |
| 80                   | 17                | 6 h               | Mouse female | No         | No     | 21.2       | Decrease of 5°C | n.d.                                    | Hemelrijk et al. (2018)  |
| 0                    | 5                 | 6 h               | Mouse female | No         | No     | 21.2       | Decrease of 7°C | n.d.                                    | Hemelrijk et al. (2018)  |
| 60                   | 21 (air)          | 30 min            | Mouse        | No         | n.r.   | 23–24      | 36.7            | 50%                                     | Haouzi et al. (2008)     |
| 60                   | 21 (air)          | 30 min            | Sheep        | Yes        | Yes    | n.r.       | No change       | No change                               | Haouzi et al. (2008)     |
| 20–80                | 17.5              | 6 h (1.5 h steps) | Pig          | Yes        | n.r.   | 22         | ~33             | Less decrease than control (no $H_2S$ ) | Li et al. (2008)         |

Values indicate the lowest  $T_b$  and the lowest metabolic rate (% of control) recorded at the end of  $H_2S$  gas exposure. Metabolic rate values refer to reported  $O_2$  consumption rate.  $T_b$  values refer to reported core body temperature, except for data from Hemelrijk et al. (2018), where data refer to superficial body temperature measured by thermic camera.  $T_a$ , ambient temperature during  $H_2S$  exposure; n.r., not reported; n.d., not determined.

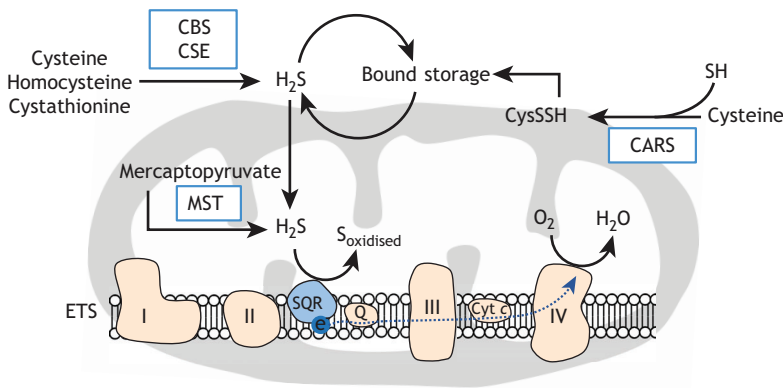

**Fig. 2. Schematic overview of H<sub>2</sub>S production and degradation.** H<sub>2</sub>S originates from various sources, including enzymatic production by cystathionine β-synthase (CBS), cystathionine γ-lyase (CSE) and 3-mercaptopyruvate sulfurtransferase (MST), but also from the release of protein-bound sulfur, originating in part from cysteinyl-tRNA synthetase (CARS). The enzyme sulfide:quinone oxidoreductase (SQR), located in the inner mitochondrial membrane, tightly controls the levels of H<sub>2</sub>S by continuous H<sub>2</sub>S oxidation. In this process one electron (e) is donated to the ubiquinone (Q) of the electron transport system (ETS), thus stimulating respiration. CysSSH, cysteine persulfides; SH, thiol; I–IV, complexes I–IV.

brown bears is used not only for synthesis of H<sub>2</sub>S but also for the synthesis of glutathione (Revsbech et al., 2014), a major antioxidant involved in the defense against reactive oxygen species (ROS).

In lung tissue from Syrian hamsters, H<sub>2</sub>S synthesis has been found to increase during early and late torpor owing to increased expression of CBS, and both CBS expression and H<sub>2</sub>S levels decreased to normal levels during IBE (Talaei et al., 2012). These changes are associated with the rapid lung remodeling taking place during torpor rather than with changes in lung metabolic rate (Talaei et al., 2012). Although this mechanism of H<sub>2</sub>S regulation appears to be energetically costly, these results imply that CBS is partly degraded during the short period of IBE (typically <24 h) and then resynthesized during torpor in a cyclic manner, at least in the lung. In contrast, in thirteen-lined ground squirrels, a proteomic study reported lower CBS expression during torpor compared with IBE and summer in the liver, a major metabolic organ (Hindle et al., 2014). This finding aligns with the almost complete arrest of transcription and translation at the low body temperature of torpor in this tissue (Van Breukelen and Martin, 2001). Although regular changes in CBS expression may be a feasible strategy for regulating H<sub>2</sub>S levels in the lung of hibernating Syrian hamsters, this does not seem to apply to other species or organs, particularly the liver, which undergoes significant metabolic depression during torpor (Muleme et al., 2006).

In addition to changes in the expression of H<sub>2</sub>S-producing enzymes, changes in endogenous H<sub>2</sub>S levels may also originate from existing bound sources of sulfur, including protein-bound persulfides and polysulfides (Kolluru et al., 2013). H<sub>2</sub>S release from bound storage may be especially beneficial during hibernation, where free amino acids, such as cysteine, are a limited source and are largely preserved and directed away from the urea cycle to limit protein muscle breakdown (Rice et al., 2020). For instance, in the blood of winter-hibernating brown bears, levels of H<sub>2</sub>S in red blood cells appear to derive in part from bound sulfane sulfur, allowing cysteine to be allocated to boost glutathione synthesis (Revsbech et al., 2014). The recently discovered cysteinyl-tRNA synthetase (CARS) pathway may contribute to the bound sulfur pool during protein translation. CARS can act as cysteine persulfide synthases that produce cysteine persulfides (CysSSH), which can be a source of protein persulfidation (R-SSH) (Akaike et al., 2017; Fukuto et al., 2018). Both CysSSH and protein persulfides can release free H<sub>2</sub>S upon reduction, e.g. by thioredoxin (Dóka et al., 2016). Taken together, these data suggest that H<sub>2</sub>S does not originate from a single source, but from a combination of enzymatic *de novo* synthesis, increased substrate availability and release from existing bound sulfur sources, depending on the species and the tissue. Specifically, the torpor-dependent upregulation of H<sub>2</sub>S-producing enzymes

remains to be investigated more broadly, to clarify in which hibernators and organs it may occur.

### The effect of H<sub>2</sub>S on mitochondrial respiration

Though changes in endogenous H<sub>2</sub>S levels and in the expression of the enzymes involved in its production provide evidence that H<sub>2</sub>S metabolism is associated with hibernation, they do not reveal the mechanisms by which H<sub>2</sub>S is capable of suppressing metabolic rate in torpor. To elucidate this, we will now focus on the mitochondrial targets of H<sub>2</sub>S signaling during torpor, an aspect that has been investigated recently.

The suppression of whole-animal metabolism during torpor is reflected by suppression of mitochondrial function – a key feature for understanding mechanisms of metabolic depression (Staples, 2014). This is exemplified by liver mitochondria isolated from thirteen-lined ground squirrels, showing ~70% lower respiration rates in torpor than in IBE (Muleme et al., 2006; Staples, 2014). This suppression of mitochondrial metabolism originates from phosphorylation-dependent changes in the activities of ETS complexes I and II (Mathers and Staples, 2019), with ETS and mitochondrial content remaining unchanged (Mathers and Staples, 2015; Mathers et al., 2017). However, other inhibitory mechanisms can contribute to depress mitochondrial respiration further, specifically a direct inhibition of cytochrome *c* oxidase by H<sub>2</sub>S.

The inhibitory effect of H<sub>2</sub>S on respiration has been widely demonstrated in purified cytochrome *c* oxidase, isolated mitochondria, various cell lines and animal models (Collman et al., 2009; Cooper and Brown, 2008; Leschelle et al., 2005; Módis et al., 2014; Sun et al., 2012; Wu et al., 2011). The inhibitory interaction of H<sub>2</sub>S with cytochrome *c* oxidase is complex and concentration-dependent. Inhibition is reversible at low H<sub>2</sub>S concentrations, with a binding constant of ~0.2 μmol l<sup>-1</sup> (Cooper and Brown, 2008; Collman et al., 2009; Szabo et al., 2014), i.e. comparable to physiological levels of H<sub>2</sub>S. However, the effect of H<sub>2</sub>S on mitochondrial function is tightly regulated by the activity of the mitochondrial enzyme sulfide:quinone oxidoreductase (SQR), which is embedded in the inner membrane (Fig. 2). SQR is the first enzyme in the H<sub>2</sub>S oxidation pathway that continuously oxidizes H<sub>2</sub>S to thiosulfate, sulfite and sulfate through a series of enzymatic reactions, thereby regulating the *in vivo* levels of H<sub>2</sub>S via its oxidative breakdown. Similar to cytochrome *c* oxidase, SQR binds H<sub>2</sub>S tightly, with a reported binding constant of ~0.1–2 μmol l<sup>-1</sup> (Lagoutte et al., 2010; Abou-Hamdan et al., 2015). Once H<sub>2</sub>S binds to SQR (Olson, 2011), electrons are donated to the ETS via ubiquinone to complex III. Thus, H<sub>2</sub>S at low levels is capable of stimulating respiration by functioning as an inorganic substrate (Goubern et al., 2007; Módis et al., 2014; Szabo et al., 2014; Yong



the picture, sirtuin 3 may itself be activated by S-persulfidation (Yuan et al., 2019), suggesting an intricate mechanism where high H<sub>2</sub>S may activate sirtuin 3 and trigger deacetylation of SQR, which would lead to accumulation of H<sub>2</sub>S. Future work will clarify whether SQR is reversibly acetylated during the hibernation season and by which mechanism.

SQR expression is itself H<sub>2</sub>S-dependent and regulated by the transcription factor nuclear factor-erythroid 2-related factor 2 (Nrf2), which also controls the expression of antioxidant genes such as thioredoxin and glutathione reductase (Harvey et al., 2009; Kensler et al., 2007). Nrf2 is tightly controlled by the repressor protein Keap1, which promotes Nrf2 degradation. Keap1 itself can be inactivated by H<sub>2</sub>S, which persulfidates two cysteines on Keap1 (Hourihan et al., 2013; Yang et al., 2013). This alleviates repression of Nrf2, which subsequently translocates to the nucleus and facilitates gene transcription (Fig. 3). The H<sub>2</sub>S-dependent stimulation of Nrf2 stability has been demonstrated in mice, where intravenous injection of H<sub>2</sub>S increases Nrf2 levels in cardiac tissue after 30 min (Calvert et al., 2009). In thirteen-lined ground squirrels, levels of Nrf2 increase in the heart, liver and brown adipose tissue during torpor (Morin et al., 2008), and elevated H<sub>2</sub>S levels during torpor could potentially contribute to Nrf2 stability and an increase in SQR expression. A study on Nrf2-deficient mouse embryonic fibroblasts found no change in the expression of SQR upon treatment with H<sub>2</sub>S, whereas SQR expression increased in wild-type cells (Hourihan et al., 2013). Thus, increased levels of H<sub>2</sub>S can increase Nrf2 stability, which may then contribute to enhanced SQR expression, leading to increased H<sub>2</sub>S oxidation. This negative feedback loop acts as a safety valve that prevents H<sub>2</sub>S levels from accumulating to toxic levels, but, as it involves protein synthesis, it would be an energetically expensive control mechanism in the context of torpor and arousal, but could be feasible in different seasons. During torpor, SQR activity is inhibited (Jensen et al., 2021), so its Nrf2-mediated expression is probably not substantial. Although SQR regulation by H<sub>2</sub>S remains unclear in hibernators, potential mechanisms involve its post-translational acetylation and/or Nrf2-induced expression, both of which remain to be investigated further.

### H<sub>2</sub>S function goes beyond metabolic suppression

In addition to metabolic rate, H<sub>2</sub>S controls a variety of physiological responses, such as vascular tone (Yang et al., 2008; Zhao et al., 2001), neuromodulation (Abe and Kimura, 1996; Kimura and Kimura, 2004) and cytoprotection (Calvert et al., 2010; Elrod et al., 2007). The redox potential and reactivity of H<sub>2</sub>S are comparable to those of glutathione and cysteine (Carballal et al., 2011; Mishanina et al., 2015), but because *in vivo* levels of H<sub>2</sub>S are much lower than those of glutathione and free cysteine (Mishanina et al., 2015), any direct ROS scavenging by H<sub>2</sub>S is probably negligible. Instead, H<sub>2</sub>S may be indirectly involved in protective mechanisms of ROS scavenging and enhancement of antioxidant defense through increasing activity and levels of antioxidants, such as glutathione and superoxide dismutase (Kimura and Kimura, 2004; Kimura et al., 2010; Sun et al., 2012).

Some mismatch between oxygen supply and consumption resembling ischemia/reperfusion may occur in the transitions between torpor and arousal and potentially cause a surge of mitochondrial ROS, but this does not seem to result in major oxidative stress in hibernators and effects appear to be tissue specific and transient (Staples, 2016). Hibernators appear in general more resistant to oxidative damage than mammals of similar size, suggesting some adaptive traits in these animals. Cardiac arrest does

not damage hippocampal neurons (Dave et al., 2006) or the liver (Bogren et al., 2014) of Arctic ground squirrels compared with rats. Livers of thirteen-lined ground squirrels in the hibernation season tolerate ischemia/reperfusion better than those of rats or summer squirrels (Lindell et al., 2005). Arousal in Arctic ground squirrels is associated with some oxidative damage in brown adipose tissue but not in the liver (Orr et al., 2009).

In addition to metabolic suppression of torpor, H<sub>2</sub>S could be involved in cytoprotection during the hibernation season, although more evidence is needed. Treatment with H<sub>2</sub>S has been found to decrease ROS levels under ischemia/reperfusion of rat cardiomyocytes (Sun et al., 2012) and to prevent oxidative damage in porcine kidneys (Maassen et al., 2019). H<sub>2</sub>S may also act by increasing antioxidant capacity through stimulation of the Nrf2 transcription pathway, as discussed above (Fig. 3). In general, H<sub>2</sub>S has a broad range of functions, and thus H<sub>2</sub>S signaling may be relevant in many physiological responses during hibernation, including changes in peripheral vasoconstriction, where H<sub>2</sub>S may contribute through its ability to regulate vascular tone (Yang et al., 2008; Zhao et al., 2001).

### Concluding remarks

Significant changes in the endogenous levels and composition of H<sub>2</sub>S metabolites have been reported recently in several hibernating mammals. Although changes in the activity and expression of enzymes involved in H<sub>2</sub>S production may be involved (Talaie et al., 2012), a key regulatory site appears to be the mitochondrial enzyme SQR, which controls H<sub>2</sub>S levels *in vivo* via oxidation (Jensen et al., 2021; Marutani et al., 2021). The underlying mechanism involves decreased SQR activity during torpor, possibly mediated by acetylation, which causes a build-up *in vivo* of H<sub>2</sub>S with consequent inhibition of complex IV and metabolic suppression. Several aspects need to be examined further, especially identifying the regulatory mechanism of SQR activity by post-translational modifications, possibly including reversible binding of acetyl group or H<sub>2</sub>S. Other aspects that remain to be investigated are redox buffer capacity and the content of accessible cysteines in hibernator proteins and how these may help regulate *in vivo* levels of H<sub>2</sub>S and determine thresholds of inhibitory levels and toxicity. Moreover, H<sub>2</sub>S may be indirectly involved in other adaptive mechanisms during hibernation, such as cytoprotective antioxidant defense. Investigations on the nature of H<sub>2</sub>S signaling and of mitochondrial regulation in comparative studies appear critical to improve our understanding on the mechanisms of torpor and hibernation.

### Acknowledgements

We thank three anonymous reviewers for useful suggestions.

### Competing interests

The authors declare no competing or financial interests.

### Funding

This research was supported by the Novo Nordisk Fonden (grant NNF19OC0057938 to A.F.).

### References

- Abe, K. and Kimura, H. (1996). The possible role of hydrogen sulfide as an endogenous neuromodulator. *J. Neurosci.* **16**, 1066-1071. doi:10.1523/JNEUROSCI.16-03-01066.1996
- Abou-Hamdan, A., Guedouari-Bounihi, H., Lenoir, V., Andriamihaja, M., Blachier, F. and Bouillaud, F. (2015). Oxidation of H<sub>2</sub>S in mammalian cells and mitochondria. *Methods Enzymol.* **554**, 201-228. doi:10.1016/bs.mie.2014.11.042
- Ahn, B.-H., Kim, H.-S., Song, S., Lee, I. H., Liu, J., Vassilopoulos, A., Deng, C.-X. and Finkel, T. (2008). A role for the mitochondrial deacetylase Sirt3 in regulating

- energy homeostasis. *Proc. Natl. Acad. Sci. USA* **105**, 14447-14452. doi:10.1073/pnas.0803790105
- Akaike, T., Ida, T., Wei, F.-Y., Nishida, M., Kumagai, Y., Alam, M. M., Ihara, H., Sawa, T., Matsunaga, T., Kasamatsu, S. et al.** (2017). Cysteinyl-tRNA synthetase governs cysteine polysulfidation and mitochondrial bioenergetics. *Nat. Commun.* **8**, 1177. doi:10.1038/s41467-017-01311-y
- Bearden, S. E., Beard, R. S. and Pfau, J. C.** (2010). Extracellular transsulfuration generates hydrogen sulfide from homocysteine and protects endothelium from redox stress. *Am. J. Physiol. Heart Circ. Physiol.* **299**, H1568-H1576. doi:10.1152/ajpheart.00555.2010
- Bianco, C. L., Savitsky, A., Feelisch, M. and Cortese-Krott, M. M.** (2018). Investigations on the role of hemoglobin in sulfide metabolism by intact human red blood cells. *Biochem. Pharmacol.* **149**, 163-173. doi:10.1016/j.bcp.2018.01.045
- Blackstone, E., Morrison, M. and Roth, M. B.** (2005). H<sub>2</sub>S induces a suspended animation-like state in mice. *Science* **308**, 518. doi:10.1126/science.1108581
- Bogren, L. K., Olson, J. M., Carpluk, J., Moore, J. M. and Drew, K. L.** (2014). Resistance to systemic inflammation and multi organ damage after global ischemia/reperfusion in the Arctic ground squirrel. *PLoS ONE* **9**, e94225. doi:10.1371/journal.pone.0094225
- Brown, J. C. L. and Staples, J. F.** (2014). Substrate-specific changes in mitochondrial respiration in skeletal and cardiac muscle of hibernating thirteen-lined ground squirrels. *J. Comp. Physiol. B* **184**, 401-414. doi:10.1007/s00360-013-0799-3
- Brown, J. C. L., Chung, D. J., Belgrave, K. R. and Staples, J. F.** (2012). Mitochondrial metabolic suppression and reactive oxygen species production in liver and skeletal muscle of hibernating thirteen-lined ground squirrels. *Am. J. Physiol. Regul. Integr. Comp. Physiol.* **302**, R15-R28. doi:10.1152/ajpregu.00230.2011
- Calvert, J. W., Jha, S., Gundewar, S., Elrod, J. W., Ramachandran, A., Pattillo, C. B., Kevil, C. G. and Lefer, D. J.** (2009). Hydrogen sulfide mediates cardioprotection through nrf2 signaling. *Circ. Res.* **105**, 365-374. doi:10.1161/CIRCRESAHA.109.199919
- Calvert, J. W., Coetzee, W. A. and Lefer, D. J.** (2010). Novel insights into hydrogen sulfide-mediated cytoprotection. *Antioxid. Redox Signal.* **12**, 1203-1217. doi:10.1089/ars.2009.2882
- Carballal, S., Trujillo, M., Cuevasanta, E., Bartesaghi, S., Möller, M. N., Folkes, L. K., García-Bereguain, M. A., Gutiérrez-Merino, C., Wardman, P., Denicola, A. et al.** (2011). Reactivity of hydrogen sulfide with peroxynitrite and other oxidants of biological interest. *Free Radic. Biol. Med.* **50**, 196-205. doi:10.1016/j.freeradbiomed.2010.10.705
- Cimen, H., Han, M.-J., Yang, Y., Tong, Q., Koc, H. and Koc, E. C.** (2010). Regulation of succinate dehydrogenase activity by SIRT3 in mammalian mitochondria. *Biochemistry* **49**, 304-311. doi:10.1021/bi901627u
- Collman, J. P., Ghosh, S., Dey, A. and Decréau, R. A.** (2009). Using a functional enzyme model to understand the chemistry behind hydrogen sulfide induced hibernation. *Proc. Natl. Acad. Sci. USA* **106**, 22090-22095. doi:10.1073/pnas.0904082106
- Cooper, C. E. and Brown, G. C.** (2008). The inhibition of mitochondrial cytochrome oxidase by the gases carbon monoxide, nitric oxide, hydrogen cyanide and hydrogen sulfide: chemical mechanism and physiological significance. *J. Bioenerg. Biomembr.* **40**, 533-539. doi:10.1007/s10863-008-9166-6
- D'Alessandro, A., Nemkov, T., Bogren, L. K., Martin, S. L. and Hansen, K. C.** (2017). Comfortably numb and back: plasma metabolomics reveals biochemical adaptations in the hibernating 13-lined ground squirrel. *J. Proteome Res.* **16**, 958-969. doi:10.1021/acs.jproteome.6b00884
- Dave, K. R., Prado, R., Raval, A. P., Drew, K. L. and Perez-Pinzon, M. A.** (2006). The Arctic ground squirrel brain is resistant to injury from cardiac arrest during euthermia. *Stroke* **37**, 1261-1265. doi:10.1161/01.STR.0000217409.60731.38
- Ditrói, T., Nagy, A., Martinelli, D., Rosta, A., Kožich, V. and Nagy, P.** (2019). Comprehensive analysis of how experimental parameters affect H<sub>2</sub>S measurements by the monobromobimane method. *Free Radic. Biol. Med.* **136**, 146-158. doi:10.1016/j.freeradbiomed.2019.04.006
- Dóka, É., Pader, I., Biró, A., Johansson, K., Cheng, Q., Ballagó, K., Prigge, J. R., Pastor-Flores, D., Dick, T. P., Schmidt, E. E. et al.** (2016). A novel persulfide detection method reveals protein persulfide- and polysulfide-reducing functions of thioredoxin and glutathione systems. *Sci. Adv.* **2**, e1500968. doi:10.1126/sciadv.1500968
- Elrod, J. W., Calvert, J. W., Morrison, J., Doeller, J. E., Kraus, D. W., Tao, L., Jiao, X., Scalia, R., Kiss, L., Szabo, C. et al.** (2007). Hydrogen sulfide attenuates myocardial ischemia-reperfusion injury by preservation of mitochondrial function. *Proc. Natl. Acad. Sci. USA* **104**, 15560-15565. doi:10.1073/pnas.0705891104
- Fukuto, J. M., Ignarro, L. J., Nagy, P., Wink, D. A., Kevil, C. G., Feelisch, M., Cortese-Krott, M. M., Bianco, C. L., Kumagai, Y., Hobbs, A. J. et al.** (2018). Biological hydropersulfides and related polysulfides – a new concept and perspective in redox biology. *FEBS Lett.* **592**, 2140-2152. doi:10.1002/1873-3468.13090
- Giroud, S., Habold, C., Nespolo, R. F., Mejías, C., Terrien, J., Logan, S. M., Henning, R. H. and Storey, K. B.** (2021). The torpid state: recent advances in metabolic adaptations and protective mechanisms. *Front. Physiol.* **11**, 623665. doi:10.3389/fphys.2020.623665
- Giuffrè, A. and Vicente, J. B.** (2018). Hydrogen sulfide biochemistry and interplay with other gaseous mediators in mammalian physiology. *Oxid. Med. Cell. Longev.* **2018**, 1-31. doi:10.1155/2018/6290931
- Goubern, M., Andriamihaja, M., Nübel, T., Blachier, F. and Bouillaud, F.** (2007). Sulfide, the first inorganic substrate for human cells. *FASEB J.* **21**, 1699-1706. doi:10.1096/fj.06-7407com
- Haouzi, P., Notet, V., Chenuel, B., Chalon, B., Sponne, I., Ogier, V. and Bihain, B.** (2008). H<sub>2</sub>S induced hypometabolism in mice is missing in sedated sheep. *Respir. Physiol. Neurobiol.* **160**, 109-115. doi:10.1016/j.resp.2007.09.001
- Harvey, C. J., Thimmulappa, R. K., Singh, A., Blake, D. J., Ling, G., Wakabayashi, N., Fujii, J., Myers, A. and Biswal, S.** (2009). Nrf2-regulated glutathione recycling independent of biosynthesis is critical for cell survival during oxidative stress. *Free Radic. Biol. Med.* **46**, 443-453. doi:10.1016/j.freeradbiomed.2008.10.040
- Heldmaier, G., Ortman, S. and Elvert, R.** (2004). Natural hypometabolism during hibernation and daily torpor in mammals. *Respir. Physiol. Neurobiol.* **141**, 317-329. doi:10.1016/j.resp.2004.03.014
- Hemelrijk, S. D., Dirkes, M. C., Van Velzen, M. H. N., Bezemer, R., Van Gulik, T. M. and Heger, M.** (2018). Exogenous hydrogen sulfide gas does not induce hypothermia in normoxic mice. *Sci. Rep.* **8**, 3855. doi:10.1038/s41598-018-21729-8
- Hindle, A. G., Grabek, K. R., Epperson, L. E., Karimpour-Fard, A. and Martin, S. L.** (2014). Metabolic changes associated with the long winter fast dominate the liver proteome in 13-lined ground squirrels. *Physiol. Genomics* **46**, 348-361. doi:10.1152/physiolgenomics.00190.2013
- Hourihan, J. M., Kenna, J. G. and Hayes, J. D.** (2013). The gasotransmitter hydrogen sulfide induces Nrf2-target genes by inactivating the keep1 ubiquitin ligase substrate adaptor through formation of a disulfide bond between Cys-226 and Cys-613. *Antioxid. Redox Signal.* **19**, 465-481. doi:10.1089/ars.2012.4944
- Jensen, B. and Fago, A.** (2018). Reactions of ferric hemoglobin and myoglobin with hydrogen sulfide under physiological conditions. *J. Inorg. Biochem.* **182**, 133-140. doi:10.1016/j.jinorgbio.2018.02.007
- Jensen, B. and Fago, A.** (2020). A novel possible role for met hemoglobin as carrier of hydrogen sulfide in the blood. *Antioxid. Redox Signal.* **32**, 258-265. doi:10.1089/ars.2019.7877
- Jensen, B. S., Pardue, S., Duffy, B., Kevil, C. G., Staples, J. F. and Fago, A.** (2021). Suppression of mitochondrial respiration by hydrogen sulfide in hibernating 13-lined ground squirrels. *Free Radic. Biol. Med.* **169**, 181-186. doi:10.1016/j.freeradbiomed.2021.04.009
- Kabil, O., Vitvitsky, V., Xie, P. and Banerjee, R.** (2011). The quantitative significance of the transsulfuration enzymes for H<sub>2</sub>S production in murine tissues. *Antioxid. Redox Signal.* **15**, 363-372. doi:10.1089/ars.2010.3781
- Kensler, T. W., Wakabayashi, N. and Biswal, S.** (2007). Cell survival responses to environmental stresses via the Keap1-Nrf2-ARE pathway. *Annu. Rev. Pharmacol. Toxicol.* **47**, 89-116. doi:10.1146/annurev.pharmtox.46.120604.141046
- Kimura, Y. and Kimura, H.** (2004). Hydrogen sulfide protects neurons from oxidative stress. *FASEB J.* **18**, 1165-1167. doi:10.1096/fj.04-1815fje
- Kimura, Y., Goto, Y.-I. and Kimura, H.** (2010). Hydrogen sulfide increases glutathione production and suppresses oxidative stress in mitochondria. *Antioxid. Redox Signal.* **12**, 1-13. doi:10.1089/ars.2008.2282
- Kolluru, G. K., Shen, X., Bir, S. C. and Kevil, C. G.** (2013). Hydrogen sulfide chemical biology: pathophysiological roles and detection. *Nitric Oxide* **35**, 5-20. doi:10.1016/j.niox.2013.07.002
- Lagoutte, E., Mimoun, S., Andriamihaja, M., Chaumontet, C., Blachier, F. and Bouillaud, F.** (2010). Oxidation of hydrogen sulfide remains a priority in mammalian cells and causes reverse electron transfer in colonocytes. *Biochim. Biophys. Acta Bioenerg.* **1797**, 1500-1511. doi:10.1016/j.bbabi.2010.04.004
- Leschelle, X., Goubern, M., Andriamihaja, M., Blottière, H. M., Couplan, E., Gonzalez-Barroso, M.-D.-M., Petit, C., Pagniez, A., Chaumontet, C., Mignotte, B. et al.** (2005). Adaptive metabolic response of human colonic epithelial cells to the adverse effects of the luminal compound sulfide. *Biochim. Biophys. Acta Gen. Subj.* **1725**, 201-212. doi:10.1016/j.bbagen.2005.06.002
- Li, J., Zhang, G., Cai, S. and Redington, A. N.** (2008). Effect of inhaled hydrogen sulfide on metabolic responses in anesthetized, paralyzed, and mechanically ventilated piglets. *Pediatr. Crit. Care Med.* **9**, 110-112. doi:10.1097/01.PCC.0000298639.08519.0C
- Lindell, S. L., Klahn, S. L., Piazza, T. M., Mangino, M. J., Torrealba, J. R., Southard, J. H. and Carey, H. V.** (2005). Natural resistance to liver cold ischemia-reperfusion injury associated with the hibernation phenotype. *Am. J. Physiol. Gastrointest. Liver Physiol.* **288**, G473-G480. doi:10.1152/ajpgi.00223.2004
- Ma, Y. L., Zhu, X., Rivera, P. M., Tøien, Ø., Barnes, B. M., LaManna, J. C., Smith, M. A. and Drew, K. L.** (2005). Absence of cellular stress in brain after hypoxia induced by arousal from hibernation in Arctic ground squirrels. *Am. J. Physiol. Regul. Integr. Comp. Physiol.* **289**, R1297-R1306. doi:10.1152/ajpregu.00260.2005
- Maassen, H., Hendriks, K. D. W., Venema, L. H., Henning, R. H., Hofker, S. H., Sijbrand, H., van Goor, H., Leuvenink, H. G. D. and Coester, A. M.** (2019). Hydrogen sulphide-induced hypometabolism in human-sized porcine kidneys. *PLoS ONE* **14**, e0225152. doi:10.1371/journal.pone.0225152

- MacCannell, A. D. V., Jackson, E. C., Mathers, K. E. and Staples, J. F.** (2018). An improved method for detecting torpor entrance and arousal in a mammalian hibernator using heart rate data. *J. Exp. Biol.* **221**, jeb174508. doi:10.1242/jeb.174508
- Malagrinò, F., Zuhra, K., Mascolo, L., Mastronicola, D., Vicente, J. B., Forte, E. and Giuffrè, A.** (2019). Hydrogen sulfide oxidation: adaptive changes in mitochondria of SW480 colorectal cancer cells upon exposure to hypoxia. *Oxidative Med. Cell. Long.* **2019**, 8102936. doi:10.1155/2019/8102936
- Marutani, E., Morita, M., Hirai, S., Kai, S., Grange, R. M. H., Miyazaki, Y., Nagashima, F., Traeger, L., Magliocca, A., Ida, T. et al.** (2021). Sulfide catabolism ameliorates hypoxic brain injury. *Nat. Commun.* **12**, 3108. doi:10.1038/s41467-021-23363-x
- Mathers, K. E. and Staples, J. F.** (2015). Saponin-permeabilization is not a viable alternative to isolated mitochondria for assessing oxidative metabolism in hibernation. *Biol. Open* **4**, 858-864. doi:10.1242/bio.011544
- Mathers, K. E. and Staples, J. F.** (2019). Differential posttranslational modification of mitochondrial enzymes corresponds with metabolic suppression during hibernation. *Am. J. Physiol. Regul. Integr. Comp. Physiol.* **317**, R262-R269. doi:10.1152/ajpregu.00052.2019
- Mathers, K. E., McFarlane, S. V., Zhao, L. and Staples, J. F.** (2017). Regulation of mitochondrial metabolism during hibernation by reversible suppression of electron transport system enzymes. *J. Comp. Physiol. B* **187**, 227-234. doi:10.1007/s00360-016-1022-0
- Milsom, W. K. and Jackson, D. C.** (2011). Hibernation and gas exchange. *Compr. Physiol.* **1**, 397-420. doi:10.1002/cphy.c090018
- Mishanina, T. V., Libiad, M. and Banerjee, R.** (2015). Biogenesis of reactive sulfur species for signaling by hydrogen sulfide oxidation pathways. *Nat. Chem. Biol.* **11**, 457-464. doi:10.1038/nchembio.1834
- Módis, K., Bos, E. M., Calzia, E., Van Goor, H., Coletta, C., Papapetropoulos, A., Hellmich, M. R., Radermacher, P., Bouillaud, F. and Szabo, C.** (2014). Regulation of mitochondrial bioenergetic function by hydrogen sulfide. Part II. Pathophysiological and therapeutic aspects. *Br. J. Pharmacol.* **171**, 2123-2146. doi:10.1111/bph.12368
- Módis, K., Ju, Y. J., Ahmad, A., Untereiner, A. A., Altaany, Z., Wu, L., Szabo, C. and Wang, R.** (2016). S-Sulphydration of ATP synthase by hydrogen sulfide stimulates mitochondrial bioenergetics. *Pharmacol. Res.* **113**, 116-124. doi:10.1016/j.phrs.2016.08.023
- Morin, P., Jr, Ni, Z., McMullen, D. C. and Storey, K. B.** (2008). Expression of Nrf2 and its downstream gene targets in hibernating 13-lined ground squirrels, *Spermophilus tridecemlineatus*. *Mol. Cell. Biochem.* **312**, 121-129. doi:10.1007/s11010-008-9727-3
- Muleme, H. M., Walpole, A. C. and Staples, J. F.** (2006). Mitochondrial metabolism in hibernation: metabolic suppression, temperature effects, and substrate preferences. *Physiol. Biochem. Zool.* **79**, 474-483. doi:10.1086/501053
- Nicholls, P., Marshall, D. C., Cooper, C. E. and Wilson, M. T.** (2013). Sulfide inhibition of and metabolism by cytochrome *c* oxidase. *Biochem. Soc. Trans.* **41**, 1312-1316. doi:10.1042/BST20130070
- Olson, K. R.** (2011). The therapeutic potential of hydrogen sulfide: separating hype from hope. *Am. J. Physiol. Regul. Integr. Comp. Physiol.* **301**, R297-R312. doi:10.1152/ajpregu.00045.2011
- Orr, A. L., Lohse, L. A., Drew, K. L. and Hermes-Lima, M.** (2009). Physiological oxidative stress after arousal from hibernation in Arctic ground squirrel. *Comp. Biochem. Physiol. A Mol. Integr. Physiol.* **153**, 213-221. doi:10.1016/j.cbpa.2009.02.016
- Rardin, M. J., Newman, J. C., Held, J. M., Cusack, M. P., Sorensen, D. J., Li, B., Schilling, B., Mooney, S. D., Kahn, C. R., Verdin, E. et al.** (2013). Label-free quantitative proteomics of the lysine acetylome in mitochondria identifies substrates of SIRT3 in metabolic pathways. *Proc. Natl. Acad. Sci. USA* **110**, 6601-6606. doi:10.1073/pnas.1302961110
- Revsbech, I. G., Malte, H., Fröbert, O., Evans, A., Blanc, S., Josefsson, J. and Fago, A.** (2013). Decrease in the red cell cofactor 2,3-diphosphoglycerate increases hemoglobin oxygen affinity in the hibernating brown bear *Ursus arctos*. *Am. J. Physiol. Regul. Integr. Comp. Physiol.* **304**, R43-R49. doi:10.1152/ajpregu.00440.2012
- Revsbech, I. G., Shen, X., Chakravarti, R., Jensen, F. B., Thiel, B., Evans, A. L., Kindberg, J., Fröbert, O., Stuehr, D. J., Kevill, C. G. et al.** (2014). Hydrogen sulfide and nitric oxide metabolites in the blood of free-ranging brown bears and their potential roles in hibernation. *Free Radic. Biol. Med.* **73**, 349-357. doi:10.1016/j.freeradbiomed.2014.05.025
- Rice, S. A., Ten Have, G. A. M., Reisz, J. A., Gehrke, S., Stefanoni, D., Frare, C., Barati, Z., Coker, R. H., D'Alessandro, A., Deutz, N. E. P. et al.** (2020). Nitrogen recycling buffers against ammonia toxicity from skeletal muscle breakdown in hibernating Arctic ground squirrels. *Nat. Metab.* **2**, 1459-1471. doi:10.1038/s42255-020-00312-4
- Serkova, N. J., Rose, J. C., Epperson, L. E., Carey, H. V. and Martin, S. L.** (2007). Quantitative analysis of liver metabolites in three stages of the circannual hibernation cycle in 13-lined ground squirrels by NMR. *Physiol. Genomics* **31**, 15-24. doi:10.1152/physiolgenomics.00028.2007
- Shen, X., Kolluru, G. K., Yuan, S. and Kevill, C. G.** (2015). Measurement of H<sub>2</sub>S *in vivo* and *in vitro* by the monobromobimane method. *Methods Enzymol.* **554**, 31-45. doi:10.1016/bs.mie.2014.11.039
- Staples, J. F.** (2014). Metabolic suppression in mammalian hibernation: the role of mitochondria. *J. Exp. Biol.* **217**, 2032-2036. doi:10.1242/jeb.092973
- Staples, J. F.** (2016). Metabolic flexibility: hibernation, torpor, and estivation. *Compr. Physiol.* **6**, 737-771. doi:10.1002/cphy.c140064
- Staples, J. F. and Brown, J. C. L.** (2008). Mitochondrial metabolism in hibernation and daily torpor: a review. *J. Comp. Physiol. B* **178**, 811-827. doi:10.1007/s00360-008-0282-8
- Sun, W.-H., Liu, F., Chen, Y. and Zhu, Y.-C.** (2012). Hydrogen sulfide decreases the levels of ROS by inhibiting mitochondrial complex IV and increasing SOD activities in cardiomyocytes under ischemia/reperfusion. *Biochem. Biophys. Res. Commun.* **421**, 164-169. doi:10.1016/j.bbrc.2012.03.121
- Szabo, C., Ransy, C., Módis, K., Andriamihaja, M., Murghes, B., Coletta, C., Olah, G., Yanagi, K. and Bouillaud, F.** (2014). Regulation of mitochondrial bioenergetic function by hydrogen sulfide. Part I. Biochemical and physiological mechanisms. *Br. J. Pharmacol.* **171**, 2099-2122. doi:10.1111/bph.12369
- Talaei, F., Bouma, H. R., van der Graaf, A. C., Strijkstra, A. M., Schmidt, M. and Henning, R. H.** (2011). Serotonin and dopamine protect from hypothermia/rearming damage through the CBS/H2S pathway. *PLoS ONE* **6**, 1-11. doi:10.1371/journal.pone.0022568
- Talaei, F., Bouma, H. R., Hylkema, M. N., Strijkstra, A. M., Boerema, A. S., Schmidt, M. and Henning, R. H.** (2012). The role of endogenous H<sub>2</sub>S formation in reversible remodeling of lung tissue during hibernation in the Syrian hamster. *J. Exp. Biol.* **215**, 2912-2919. doi:10.1242/jeb.067363
- Toëin, Ø., Blake, J., Edgar, D. M., Grahn, D. A., Heller, H. C. and Barnes, B. M.** (2011). Hibernation in black bears: independence of metabolic suppression from body temperature. *Science* **331**, 906-909. doi:10.1126/science.1199435
- Van Breukelen, F. and Martin, S. L.** (2001). Translational initiation is uncoupled from elongation at 18°C during mammalian hibernation. *Am. J. Physiol. Regul. Integr. Comp. Physiol.* **281**, R1374- R1379. doi:10.1152/ajpregu.2001.281.5.R1374
- Vitvitsky, V., Yadav, P. K., Kurthen, A. and Banerjee, R.** (2015). Sulfide oxidation by a noncanonical pathway in red blood cells generates thiosulfate and polysulfides. *J. Biol. Chem.* **290**, 8310-8320. doi:10.1074/jbc.M115.639831
- Volpato, G. P., Searles, R., Yu, B., Scherrer-Crosbie, M., Bloch, K. D., Ichinose, F. and Zapol, W. M.** (2008). Inhaled hydrogen sulfide: a rapidly reversible inhibitor of cardiac and metabolic function in the mouse. *Anesthesiology* **108**, 659-668. doi:10.1097/ALN.0b013e318167af0d
- Wu, N., Du, X., Wang, D. and Hao, F.** (2011). Myocardial and lung injuries induced by hydrogen sulfide and the effectiveness of oxygen therapy in rats. *Clin. Toxicol.* **49**, 161-166. doi:10.3109/15563650.2011.565419
- Wu, Y.-T., Lee, H.-C., Liao, C.-C. and Wei, Y.-H.** (2013). Regulation of mitochondrial F<sub>1</sub>F<sub>0</sub>ATPase activity by Sirt3-catalyzed deacetylation and its deficiency in human cells harboring 4977 bp deletion of mitochondrial DNA. *Biochim. Biophys. Acta (BBA) Mol. Basis Dis.* **1832**, 216-227. doi:10.1016/j.bbadis.2012.10.002
- Yang, G., Wu, L., Jiang, B., Yang, W., Qi, J., Cao, K., Meng, Q., Mustafa, A. K., Mu, W., Zhang, S. et al.** (2008). H<sub>2</sub>S as a physiologic vasorelaxant: hypertension in mice with deletion of cystathionine  $\gamma$ -lyase. *Science* **322**, 587-590. doi:10.1126/science.1162667
- Yang, G., Zhao, K., Ju, Y., Mani, S., Cao, Q., Puukila, S., Khaper, N., Wu, L. and Wang, R.** (2013). Hydrogen sulfide protects against cellular senescence via s-sulphydration of keap1 and activation of Nrf2. *Antioxid. Redox Signal.* **18**, 1906-1919. doi:10.1089/ars.2012.4645
- Yong, R. and Searcy, D. G.** (2001). Sulfide oxidation coupled to ATP synthesis in chicken liver mitochondria. *Comp. Biochem. Physiol. Part B Biochem. Mol. Biol.* **129**, 129-137. doi:10.1016/S1096-4959(01)00309-8
- Yuan, Y., Zhu, L., Li, L., Liu, J., Chen, Y., Cheng, J., Peng, T. and Lu, Y.** (2019). S-Sulphydration of SIRT3 by hydrogen sulfide attenuates mitochondrial dysfunction in cisplatin-induced acute kidney injury. *Antioxid. Redox Signal.* **31**, 1302-1319. doi:10.1089/ars.2019.7728
- Zhao, W., Zhang, J., Lu, Y. and Wang, R.** (2001). The vasorelaxant effect of H<sub>2</sub>S as a novel endogenous gaseous KATP channel opener. *EMBO J.* **20**, 6008-6016. doi:10.1093/emboj/20.21.6008
